# Supplementary material for: Bottom-up synthesized crystalline boron quantum dots with nonvolatile memory effects through one-step hydrothermal polymerization of ammonium pentaborane and boric acid
Source: Royal Society of Chemistry journal article supplement (doi:10.1039/d2ce00298a), 2022-01-01
Supplement: d2ce00298a1.pdf [file d2ce00298a1.pdf]

## Supporting Information

### **Bottom-up synthesized crystalline boron quantum dots with nonvolatile memory effect through one-step hydrothermal polymerization of ammonium pentaborane and boric acid**

Huiqi Wang <sup>a\*</sup>, Jiacheng Han <sup>a</sup>, Mei Wang <sup>a</sup>, Liyong Wang <sup>a</sup>, Suping Jia <sup>a</sup>, Honghong Cao <sup>a</sup>, Shengliang Hu <sup>a</sup>, Yan-Bing He <sup>b\*</sup>

*<sup>a</sup> School of Energy and Power Engineering & School of Materials Science and Engineering, North University of China, Taiyuan 030051, China*

*<sup>b</sup> Shenzhen Geim Graphene Center, Tsinghua Shenzhen International Graduate School, Tsinghua University, Shenzhen, 518055, P. R. China*

**\*Corresponding author.**

E-mail address: hqiwang@nuc.edu.cn (H. Wang)

## Supplementary Figures:

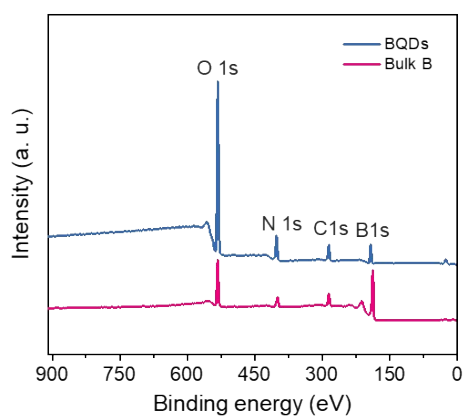

**Fig. S1** XPS survey of BQDs and bulk boron.

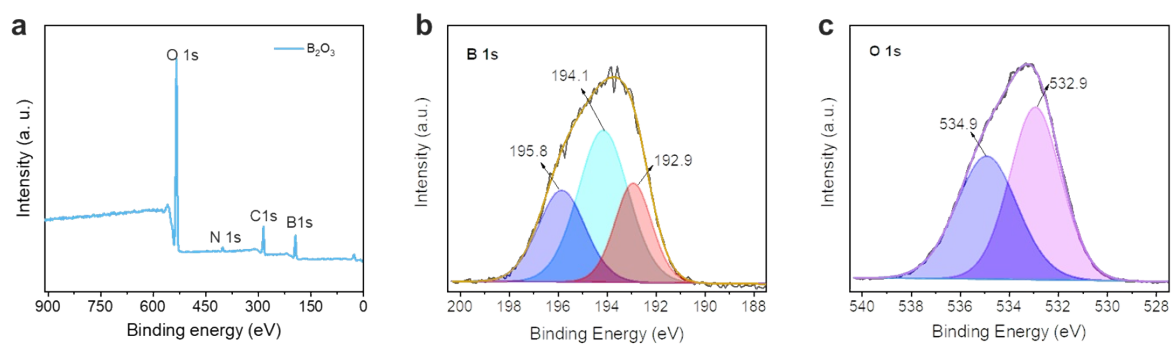

**Fig. S2** XPS survey (a), high-resolution B 1s signal (b) and O 1s signal (c) of the commercial  $B_2O_3$  powder.

## Supplementary Tables:

**Table S1** Components (at. %) of various element species for BQDs and bulk boron.

| No.        | B 1s  | C 1s  | N 1s  | O 1s  | B/O ratio |
|------------|-------|-------|-------|-------|-----------|
| BQDs       | 28.03 | 14.18 | 12.37 | 45.42 | 0.62      |
| Bulk boron | 74.47 | 10.26 | 4.73  | 10.54 | 7.07      |

**Table S2** Ratios of B1s components for BQDs and bulk boron.

| No.        | O–B–O   |        | B–B–O   |        | B–B     |        | B–B–B   |        |
|------------|---------|--------|---------|--------|---------|--------|---------|--------|
|            | BE (eV) | Area/% |
| BQDs       | 192.2   | 8.13   | 190.5   | 8.78   | 188.6   | 15.85  | 187.2   | 67.23  |
| Bulk boron | 192.2   | 3.66   | 190.7   | 4.13   | 188.6   | 19.89  | 187.3   | 72.32  |

**Table S3** Memory device performance of PVP-based composites

| Active layer                  | Switch voltage (V) | ON/OFF ratio | Reference |
|-------------------------------|--------------------|--------------|-----------|
| C60-PVP                       | 2.5                | <10          | [1]       |
| BQDs-PVP                      | 0.5                | $\sim 10^3$  | [2]       |
| MoS <sub>2</sub> -PVP         | 3.3                | $\sim 10^2$  | [3]       |
| N-doped MoS <sub>2</sub> -PVP | 0.7                | $\sim 10^3$  | [4]       |
| BPQD-PVP                      | 2.9                | $\sim 10^4$  | [5]       |
| Au NPs/ZnO nanorod-PVP        | 2.0                | $\sim 10^3$  | [6]       |
| Tri-PVP                       | 10.0               | $\sim 10^2$  | [7]       |
| BQDs-PVP                      | 5.0                | $\sim 10^3$  | This work |

## References

1. Paul, S.; Kanwal, A.; Chhowalla, M., Memory effect in thin films of insulating polymer and C60 nanocomposites. *Nanotechnology* **2005**, *17* (1), 145-151.
2. Hao, J.; Tai, G.; Zhou, J.; Wang, R.; Hou, C.; Guo, W., Crystalline Semiconductor Boron Quantum Dots. *ACS Appl Mater Interfaces* **2020**, *12* (15), 17669-17675.
3. Tang, P.; Xiao, J. J.; Zheng, C.; Wang, S.; Chen, R. F., Graphene-Like Molybdenum Disulfide and Its Application in Optoelectronic Devices. *Acta Phys-Chim Sin* **2013**, *29* (4), 667-677.
4. Wu, Z.; Wang, T.; Sun, C.; Liu, P.; Xia, B.; Zhang, J.; Liu, Y.; Gao, D., Resistive switching effect of N-doped MoS<sub>2</sub>-PVP nanocomposites films for nonvolatile memory devices. *AIP Adv* **2017**, *7* (12), 125213.
5. Zhang, X.; Xie, H.; Liu, Z.; Tan, C.; Luo, Z.; Li, H.; Lin, J.; Sun, L.; Chen, W.; Xu, Z.; Xie, L.; Huang, W.; Zhang, H., Black Phosphorus Quantum Dots. *Angewandte Chemie International Edition* **2015**, *54* (12), 3653-3657.
6. Lin, C. W.; Pan, T. S.; Chen, M. C.; Yang, Y. J.; Tai, Y.; Chen, Y. F., Organic bistable memory based on Au nanoparticle/ZnO nanorods composite embedded in poly (vinylpyrrolidone) layer. *Appl Phys Lett* **2011**, *99* (2), 023303.
7. Chang, C.-C.; Pei, Z.; Chan, Y.-J., Artificial electrical dipole in polymer multilayers for nonvolatile thin film transistor memory. *Appl Phys Lett* **2008**, *93* (14), 143302.
